# Supplementary material
Source: HighWire-hosted journal article supplement (https://www.cancerbiomed.org/content/20/3/196)
Supplement: media-2 [file media-2.pdf]

# 1 **Supplementary Materials and Methods**

## 2 **Study design and patient cohort**

3 This study was performed on two independent retrospective cohorts of patients  
4 with PDAC and another perspective cohort of patients with PDAC. The inclusion  
5 criteria were as follows: no history of other malignancies; no neo-adjuvant  
6 chemotherapy or radiotherapy; no unrespectable tumours or distant metastases pre-  
7 operation; histopathologically verified pancreatic adenocarcinoma; with complete  
8 clinic pathological data and 100% follow-up information; and systemic gemcitabine-  
9 based chemotherapy. The exclusion criteria included the following: perioperative  
10 mortality and developed a second primary cancer during follow-up. The retrospective  
11 primary training cohort included 160 patients with PDAC at the Tianjin Medical  
12 University Cancer Institute and Hospital, China from July 2011 to January 2015. 108  
13 Patients from the Tianjin Medical University Cancer Institute and Hospital, China from  
14 July 2016 to January 2018 were assigned to another retrospective validation cohort. The  
15 perspective validation cohort included 63 patients with PDAC at the Tianjin Medical  
16 University Cancer Institute and Hospital, China from January 2016 to January 2017.  
17 Furthermore, another retrospective validated cohort including 95 PDAC patients from  
18 Department of Hepatopancreatobiliary Surgery, Tongliao City Hospital, Tongliao,  
19 Inner Mongolia, China were also recruited.

20 All patients were categorized in accordance with the NCCN TNM staging system.  
21 The usage of these specimens and the patient information were approved by the Ethics  
22 Committee of the Tianjin Medical University Cancer Institute and Hospital (Tianjin,  
23 China). All patients provided written consents for the use of their specimens and disease  
24 information for future investigations in accordance with the ethics committee and  
25 Declaration of Helsinki (Ethics approval ID: AE-2021021 and 2021024).

## 26 **Immunohistochemistry (IHC), haematoxylin and eosin (H&E), image capture and** 27 **scoring**

28 IHC assays for CD8, CD133 and CK19 were performed on pancreatic cancer  
29 tissues in accordance with standard protocols. In Brief, at the first day, paraffin-  
30 embedded specimen slides with a thickness of 5µm were deparaffinised and then heated  
31 in a pressure plot for 2.5 min to retrieve the antigens, followed by 3% hydrogen  
32 peroxide. Subsequently, after being blocked with 1% bovine serum albumin blocking  
33 buffer, the slides were incubated with primary antibodies overnight at 4 °C. At the  
34 second day, the sections were incubated with secondary antibodies for 30 min at an  
35 incubator at 37°C. The diaminobenzidine (DAB) substrate kit (ORIGENE, ZLI-9019)  
36 was used for the chromogenic reaction. Finally, the slides were counterstained with  
37 hematoxylin, dehydrated and cover slipped.

1 For the IHC and H&E assays, all specimens were assessed by two independent  
2 experienced pathologists who were blinded to the patients' clinical features and  
3 outcomes. Quantitative analyses of CD8<sup>+</sup> T cell, CD133<sup>+</sup> CSCs and CK19<sup>+</sup> TBs were  
4 performed on full slides. Five random fields (100×magnification) were evaluated under  
5 a light microscope.

## 6 **Multiplexed immunofluorescence**

7 The specificity of the antibodies was validated by IHC under a bright-field  
8 microscope, and then each target was detected by uniplex immunofluorescence. Serial  
9 sections of PDAC were subjected to uniplex immunofluorescence using opal 7-colour  
10 manual IHC kits (Perkin Elmer, 2395285) in accordance with the manufacturer's  
11 instructions. In brief, 5µm PDAC slides were deparaffinized and then rehydrated  
12 through a graded series of ethanol solutions:(100% 1×10min; 95% 1×10min; and rinse  
13 in 70%) prior to antigen retrieval in heated citric acid buffer (pH 6.0) in a microwave  
14 treatment for 15min (EZ Retriever microwave). The Slides were allowed to cool down  
15 for 20 minutes at room temperature and then washed by TBST. TBST was used for all  
16 washing steps. Tissues were then blocked with blocking/dilution buffer for 10 min. The  
17 slides were incubated for 2 h with the same antibodies as those for IHC at these dilutions:  
18 CD8 (dilution 1:100), CD133 (dilution 1: 100) and CK19 (dilution 1:100). The slides  
19 were then washed three times for 3min each. The slides that had previously been  
20 incubated with CD8 antibodies were then incubated in pre-diluted anti-rabbit/mouse  
21 horseradish peroxidase-conjugated (HRP)-conjugated secondary antibodies for 10 min.  
22 Following three more washes of 3 min, the slides were incubated for 10 min with opal  
23 520 for anti-CD8 antibody visualization at 1:100 dilution. The slides that had been  
24 previously incubated with anti-CD133 antibody were incubated in opal 570 in an  
25 antibody diluent at 1:100 dilution for 10 minutes. The slides that had been previously  
26 incubated with anti-CK19 antibody was incubated in opal 690 in an antibody diluent at  
27 1:100 dilution for 10 min. Finally, following a washing step, the slides were  
28 counterstained for 10 min with DAPI at 1:20 dilution in deionized water. Optimal  
29 antibody dilutions in the uniplexed immunofluorescence slides were selected to ensure  
30 optimal signal-to-noise ratio and specific staining pattern when digitized on the Tissue  
31 Gnostics whole slide scanner (Zeiss). Fluorescence slides were compared with serial  
32 sections of bright-field DAB slides using the same antibodies. Positive and negative  
33 controls were included in each staining run. The positive controls for CD8 antibodies  
34 were the spleen as specified above.

35 After determination of the appropriate dilution of antibodies and  
36 immunofluorescence signals, we assessed them multiplexed on a single tissue section.  
37 In brief, 5µm PDAC slides were deparaffinized and rehydrated through a graded series  
38 of ethanol solutions:(100% 1×10min; 95% 1×10min; and rinse in 70%) prior to antigen  
39 retrieval in heated citric acid buffer (pH 6.0) in a microwave treatment for 15min (EZ  
40 Retriever microwave). The first run of labelling included the primary antibody against

1 CD8 prior to antibody stripping, followed by labelling with primary antibodies against  
2 CD133 and CK19 prior to counterstaining with DAPI. Our multiplexed sections  
3 showed no dramatic change in specific signals or nonspecific background signals  
4 compared with the uniplex-labelled serial sections. The stained slides were scanned  
5 over the whole slide using the Tissue Gnostics system (Zeiss). A slide reviewer was  
6 used to select the regions of interest in an unbiased manner. The exposure times for  
7 DAPI, opal 520, opal 570, and opal 690 channels were 10, 20, 25, and 100ms,  
8 respectively. The selected images were then captured with a  $\times 20$  lens and unstained  
9 tissues were used to extract the tissue auto-fluorescence. Images were analyzed using  
10 Tissue Gnostics analysis software 2.4.

## 11 **Artificial intelligence (AI)-based image analysis**

12 Digital whole slide fluorescence images were uploaded into Tissue Gnostics  
13 Image Analysis software (version 2.4) for image analysis. Cellular segmentation  
14 models achieve the goal of pixel-wise binary classification based on setting intensity  
15 thresholds for an image and using the min and max thresholds to classify the pixels in  
16 an image as cell objects or background. Before we assessed multiplexed IHC on a single  
17 tissue section, the slides staining with single primary antibody and related secondary  
18 fluorophores were analyzed and the fluorescence signal in each channel were acquired.  
19 Moreover, the blank slide with no any primary antibody staining were also analyzed  
20 and the background auto-fluorescence of each channel were also acquired. By  
21 comparing the difference of the auto-fluorescence intensity of the blank slide and the  
22 fluorescence intensity of the slides stained with single primary antibody and related  
23 fluorophores, we finally determined the optimal threshold to distinguish the auto-  
24 fluorescence signal and the positive-fluorescence signal. Full algorithm workflow and  
25 settings are shown as below:

## 26 **Cellular segmentation**

27 The nuclei in the whole slide image were automatically segmented using Tissue  
28 Gnostics analysis software 2.4. We determined the optimal module parameters for  
29 nuclei detection, such as different dye weights (DAPI nuclear weight=5, opal 520  
30 nucleus weigh=0.15, opal 570 nucleus weight=0.243, opal 690 nucleus weight=0.113,  
31 nuclear contrast threshold (0.4), minimum nuclear intensity (0.032), nuclear  
32 segmentation aggressiveness (0.75), and default nuclear size setting ( $1-450 \mu\text{m}^2$ ). All  
33 samples were analyzed using these specific settings. After determination the position  
34 of nuclei, the cytoplasm were segmented using the default cytoplasm size setting  
35 ( $450\mu\text{m}^2-1000\mu\text{m}^2$ ).

## 36 **Recognition and analysis of tumor-infiltrating CD8<sup>+</sup> T lymphocytes**

37 After segmenting the nuclei (DAPI) under the same analysis module, the cells  
38 were then classified as CD8 (opal 520) positive based on dye nucleus-positive threshold

1 (opal 520 0.344), cytoplasm-positive threshold (opal 520 0.025) and membrane-  
2 positive threshold (opal 520 0.025). Consistent settings of analysis algorithm were  
3 applied to all slides of patients. The algorithm was used to automatically quantify the  
4 number of each lymphocyte classification across the whole slide image. The area of  
5 analyzed fields was calculated, and the density of CD8<sup>+</sup> T lymphocytes (number/area)  
6 was acquired.

### 7 **Recognition and analysis of tumor-infiltrating CD133<sup>+</sup> T lymphocytes**

8 After segmenting the nuclei (DAPI) under the same analysis module, the cells  
9 were classified as CD133 (opal 570) positive based on dye nucleus-positive threshold  
10 (opal 570 0.524), cytoplasm-positive threshold (opal 570 0.045) and membrane-  
11 positive threshold (opal 570 0.045). Consistent settings of analysis algorithm were  
12 applied to all slides of patients. The algorithm was used to automatically quantify the  
13 number of each CD133<sup>+</sup> cell classification across the whole slide image. The area of  
14 analyzed fields was calculated and the density of CD133<sup>+</sup> CSCs (number/area) were  
15 acquired.

### 16 **Recognition and analysis of tumor-infiltrating CK19<sup>+</sup> TBs and CK19<sup>+</sup> PDAC** 17 **ducts**

18 After segmenting the nuclei (DAPI) under the same analysis module, the cells  
19 were then classified as CK19 (opal 690) positive based on dye nucleus-positive  
20 threshold (opal 690 0.624), cytoplasm-positive threshold (opal 690 0.025) and  
21 membrane-positive threshold (opal 690 0.025). Consistent settings of analysis  
22 algorithm were applied to all slides of patients. A TB is typically defined as a single  
23 tumor cell or tumor cell cluster of up to five cells at the invasive tumor front. Thus,  
24 once tumor regions were detected, nuclei were segmented using the methodology  
25 described above and cancer cells were classified based on CK19 positivity in the  
26 nucleus (0.624), cytoplasm (0.025), and membrane (0.025). Then, CK19<sup>+</sup> TB and  
27 CK19<sup>+</sup> PDAC ducts were recognized according to the number of nuclei and  
28 morphology. The density (number/mm<sup>2</sup>) and number of TBs were then exported from  
29 the algorithm.

### 30 **Spatial analysis of TBs, CSCs and CD8<sup>+</sup> T cells**

31 Spatial distributions of the TBs, CSCs and CD8<sup>+</sup> T cells were imported into a  
32 spatial dot plot within the Tissue Gnostics software. According to this plot, the spatial  
33 analysis algorithm was utilized to calculate the number of CD8<sup>+</sup> T cells between 0 and  
34 100 μm radii of TBs or CSCs in consecutively increasing 20 μm steps, creating five  
35 classes: 0–20 μm, 20–40 μm, 40–60 μm, and so on. Finally, the number and densities  
36 of CD8<sup>+</sup> T cells within these distances were established.

### 37 **Establishment of patient-derived xenograft (PDX) and culture**

1 Fresh PDAC tumor tissues were mechanically sectioned into small pieces  
2 (approximately 1mm<sup>3</sup>) and washed three times with cold phosphate-buffered saline  
3 (PBS) supplemented with 10% penicillin and streptomycin. For tumor implantation, 6-  
4 8-week-old NSG humanized mice were purchased. All mice were maintained in  
5 specific pathogen-free conditions, and animal experiment procedures were approved  
6 by the Ethics Committee of Tianjin Medical University Cancer Institute and Hospital  
7 in compliance with the principles and procedures of the NIH Guide for the Care and  
8 Use of Laboratory Animals. The mice were anesthetized, and a small incision was made  
9 on the dorsal flank. Then, tumor tissue pieces were subcutaneously implanted into the  
10 dorsal flank of each mouse, and the incision was closed. The presence of pancreatic  
11 adenocarcinoma in xenograft tumors was validated through H&E staining. When the  
12 tumour size reached approximately 1.5cm, the implanted tumors were passaged into  
13 other mice.

#### 14 **Flow cytometry**

15 The relationship among CD8<sup>+</sup> T lymphocyte, CD133<sup>+</sup>CSCs and TBs in PDAC  
16 tissues was investigated. Fresh PDAC specimens and PDX specimens were collected  
17 and divided into two parts, one part was immediately fixed in formalin buffer,  
18 embedded in paraffin and then prepared for detection of TBs via IHC staining. The  
19 second part was immediately digested into the single cell suspension with 1 mg/ml  
20 collagenase (Sigma-Aldrich, C2799), 2.5 U/ml hyaluronidase (Sigma-Aldrich, H3506)  
21 and 0.1 mg/ml DNase (Sigma-Aldrich DN25). The single cell suspension was stained  
22 with anti-CD8 (Biolegend, 300922) and anti-CD133 (Biolegend, 372806) antibodies.  
23 Isotype controls were used as negative controls. The data were analyzed using soft Flow  
24 Jo 10.0

#### 25 **Statistical analysis**

26 Statistical analyses were performed using IBM SPSS Statistics, Version 21.0. The  
27 cut-off values of each index were determined according to their median values in the  
28 PDAC patients' cohorts. Categorical variables were compared using the  $\chi^2$  test.  
29 Continuous variables were managed using the t test. The correlation between the IHC  
30 scoring and IF counting results was estimated using a Pearson coefficient analysis.  
31 Survival curves were estimated with the Kaplan-Meier method and compared using the  
32 log-rank test. Univariate and multivariate Cox analyses were performed to determine  
33 the independent risk characteristics. The hazard ratios (HRs) and 95% confidence  
34 intervals (CIs) of these variables were estimated to quantify the strength of these  
35 associations. The nomogram, calibration curve, time-dependent receiver operating  
36 characteristic (ROC) curve and decision curve analyses were conducted with R  
37 software. All statistical tests were 2-tailed. Statistical significant was considered at  
38 P<0.05.

39
