# Supplementary material
Source: HighWire-hosted journal article supplement (https://www.cancerbiomed.org/content/20/3/196)
Supplement: media-3 [file media-3.pdf]

**Supplementary Table1: Characteristics of PDAC patients in primary retrospective training cohort (N=160) and validation cohort (N=108) in our center**

| Primary cohort(N=160)         |                | Validation cohort(N=108)      |                |
|-------------------------------|----------------|-------------------------------|----------------|
| Clinico-pathological features | Frequency N(%) | Clinico-pathological features | Frequency N(%) |
| <b>Gender</b>                 |                | <b>Gender</b>                 |                |
| Male                          | 66(41.2%)      | Male                          | 69(63.8%)      |
| Female                        | 94(58.8%)      | Female                        | 39(36.2%)      |
| <b>Age</b>                    |                | <b>Age</b>                    |                |
| ≤60                           | 79(49.3%)      | ≤60                           | 64(59.2%)      |
| >60                           | 81(50.7%)      | >60                           | 44(40.8%)      |
| <b>Tumor size</b>             |                | <b>Tumor size</b>             |                |
| ≤3.5cm                        | 81(50.6%)      | ≤3.5cm                        | 37(34.2%)      |
| >3.5cm                        | 79(49.4%)      | >3.5cm                        | 71(65.8%)      |
| <b>Histological Grade</b>     |                | <b>Histological Grade</b>     |                |
| G1,G2                         | 66(41.2%)      | G1,G2                         | 53(49.1%)      |
| G3                            | 94(58.8%)      | G3                            | 55(50.1%)      |
| <b>LN metastasis</b>          |                | <b>LN metastasis</b>          |                |
| N0                            | 64(40.0%)      | N0                            | 50(46.3%)      |
| N1                            | 96(60.0%)      | N1                            | 58(53.7%)      |
| <b>TNM stage</b>              |                | <b>TNM stage</b>              |                |
| IA,IB                         | 75(46.9%)      | IA,IB                         | 54(50.0%)      |
| IIA,IIB                       | 85(53.1%)      | IIA,IIB                       | 54(50.0%)      |
| <b>Nerve invasion</b>         |                | <b>Nerve invasion</b>         |                |
| Yes                           | 52(32.5%)      | Yes                           | 75(69.4%)      |
| NO                            | 108(67.5%)     | NO                            | 33(30.6%)      |
| <b>CA19-9 (U/ml)</b>          |                | <b>CA19-9 (U/ml)</b>          |                |
| ≤573.3                        | 78(48.8%)      | ≤573.3                        | 64(59.3%)      |
| >573.3                        | 82(51.2%)      | >573.3                        | 44(40.7%)      |

**Supplementary Table2: Characteristics of PDAC patients in perspective validation cohort in our center**

| <b>Clinico-pathological features</b> | <b>Validation cohort(N=63)<br/>Frequency N(%)</b> |
|--------------------------------------|---------------------------------------------------|
| <b>Gender</b>                        |                                                   |
| Male                                 | 35(55.6%)                                         |
| Female                               | 28(44.4%)                                         |
| <b>Age</b>                           |                                                   |
| ≤60                                  | 29(46.0%)                                         |
| >60                                  | 34(54.0%)                                         |
| <b>Tumor size</b>                    |                                                   |
| ≤3.5cm                               | 32(50.8%)                                         |
| >3.5cm                               | 31(49.2%)                                         |
| <b>Histological Grade</b>            |                                                   |
| G1,G2                                | 28(44.4%)                                         |
| G3                                   | 35(55.6%)                                         |
| <b>LN metastasis</b>                 |                                                   |
| N0                                   | 33(52.4%)                                         |
| N1                                   | 30(47.6%)                                         |
| <b>TNM stage</b>                     |                                                   |
| IA,IB                                | 25(39.7%)                                         |
| IIA,IIB                              | 38(60.3%)                                         |
| <b>Nerve invasion</b>                |                                                   |
| Yes                                  | 42(66.7%)                                         |
| NO                                   | 21(33.3%)                                         |

**Supplementary Table3: Characteristics of PDAC patients in another retrospective validation cohort from Department of Hepatopancreatobiliary Surgery, Tongliao City Hospital**

| <b>Clinico-pathological features</b> | <b>Validation cohort(N=95)<br/>Frequency N(%)</b> |
|--------------------------------------|---------------------------------------------------|
| <b>Gender</b>                        |                                                   |
| Male                                 | 48(50.5%)                                         |
| Female                               | 47(49.5%)                                         |
| <b>Age</b>                           |                                                   |
| ≤60                                  | 45(47.4%)                                         |
| >60                                  | 50(52.6%)                                         |
| <b>Tumor size</b>                    |                                                   |
| ≤3.5cm                               | 35(36.8%)                                         |
| >3.5cm                               | 60(63.2%)                                         |
| <b>Histological Grade</b>            |                                                   |
| G1,G2                                | 73(76.8%)                                         |
| G3                                   | 22(23.2%)                                         |
| <b>LN metastasis</b>                 |                                                   |
| N0                                   | 58(61.1%)                                         |
| N1                                   | 37(38.9%)                                         |
| <b>TNM stage</b>                     |                                                   |
| IA,IB                                | 52(54.7%)                                         |
| IIA,IIB                              | 43(45.3%)                                         |
| <b>Nerve invasion</b>                |                                                   |
| Yes                                  | 31(32.6%)                                         |
| NO                                   | 64(67.4%)                                         |

**Supplementary Table 4: The association of CD8 index, CD133 index, TBs index, CD8/CD133 index, CD8/TBs index with clinico-pathological features-primary retrospective cohort (N=160) in our center.**

| Clinico-pathological features | CD8 index |      |          |            |              | CD133 index |      |          |            |              | TBs index |      |          |            |              | CD8/CD133 index |      |          |            |              | CD8/TBs index |      |          |            |              |
|-------------------------------|-----------|------|----------|------------|--------------|-------------|------|----------|------------|--------------|-----------|------|----------|------------|--------------|-----------------|------|----------|------------|--------------|---------------|------|----------|------------|--------------|
|                               | Low       | high | $\chi^2$ | Spearman r | P-value      | Low         | high | $\chi^2$ | Spearman r | P-value      | Low       | high | $\chi^2$ | Spearman r | P-value      | Low             | high | $\chi^2$ | Spearman r | P-value      | Low           | high | $\chi^2$ | Spearman r | P-value      |
| <b>Gender</b>                 |           |      |          |            |              |             |      |          |            |              |           |      |          |            |              |                 |      |          |            |              |               |      |          |            |              |
| Male                          | 37        | 29   | 0.197    | -0.035     | 0.66         | 36          | 30   | 0.029    | 0.013      | 0.867        | 24        | 42   | 0.846    | -0.073     | 0.361        | 36              | 30   | 0.591    | -0.061     | 0.445        | 53            | 13   | 2.071    | 0.114      | 0.152        |
| Female                        | 56        | 38   |          |            |              | 50          | 44   |          |            |              | 41        | 53   |          |            |              | 57              | 37   |          |            |              | 66            | 28   |          |            |              |
| <b>Age</b>                    |           |      |          |            |              |             |      |          |            |              |           |      |          |            |              |                 |      |          |            |              |               |      |          |            |              |
| ≤60                           | 43        | 36   | 0.875    | -0.074     | 0.353        | 40          | 39   | 0.610    | -0.062     | 0.438        | 37        | 42   | 2.495    | 0.125      | 0.116        | 43              | 36   | 0.875    | -0.074     | 0.353        | 57            | 22   | 0.405    | -0.050     | 0.528        |
| >60                           | 50        | 31   |          |            |              | 46          | 35   |          |            |              | 28        | 53   |          |            |              | 50              | 31   |          |            |              | 62            | 19   |          |            |              |
| <b>Tumor size</b>             |           |      |          |            |              |             |      |          |            |              |           |      |          |            |              |                 |      |          |            |              |               |      |          |            |              |
| ≤3.5cm3                       | 30        | 51   | 29.973   | -0.433     | <b>0.000</b> | 52          | 29   | 7.203    | 0.212      | <b>0.007</b> | 42        | 39   | 8.572    | 0.231      | <b>0.003</b> | 34              | 47   | 17.579   | -0.331     | <b>0.000</b> | 48            | 33   | 19.667   | -0.351     | <b>0.000</b> |
| >3.5cm3                       | 63        | 16   |          |            |              | 34          | 45   |          |            |              | 23        | 56   |          |            |              | 59              | 20   |          |            |              | 71            | 8    |          |            |              |
| <b>Histological Grade</b>     |           |      |          |            |              |             |      |          |            |              |           |      |          |            |              |                 |      |          |            |              |               |      |          |            |              |
| G1,G2                         | 24        | 44   | 25.326   | -0.398     | <b>0.000</b> | 45          | 23   | 7.346    | 0.214      | <b>0.007</b> | 41        | 27   | 18.968   | 0.344      | <b>0.000</b> | 26              | 42   | 19.221   | -0.347     | <b>0.000</b> | 37            | 31   | 24.729   | -0.393     | <b>0.000</b> |
| G3                            | 69        | 23   |          |            |              | 41          | 51   |          |            |              | 24        | 68   |          |            |              | 67              | 25   |          |            |              | 82            | 10   |          |            |              |
| <b>LN metastasis</b>          |           |      |          |            |              |             |      |          |            |              |           |      |          |            |              |                 |      |          |            |              |               |      |          |            |              |
| N0                            | 19        | 45   | 35.440   | -0.471     | <b>0.000</b> | 43          | 21   | 7.748    | 0.220      | <b>0.005</b> | 34        | 30   | 6.910    | 0.208      | <b>0.008</b> | 21              | 43   | 28.079   | -0.419     | <b>0.000</b> | 34            | 30   | 25.273   | -0.397     | <b>0.000</b> |
| N1                            | 74        | 22   |          |            |              | 43          | 53   |          |            |              | 31        | 65   |          |            |              | 72              | 24   |          |            |              | 85            | 11   |          |            |              |
| <b>TNM stage</b>              |           |      |          |            |              |             |      |          |            |              |           |      |          |            |              |                 |      |          |            |              |               |      |          |            |              |
| IA,IB                         | 26        | 49   | 31.918   | -0.447     | <b>0.000</b> | 53          | 22   | 16.252   | 0.319      | <b>0.000</b> | 43        | 32   | 16.639   | 0.320      | <b>0.000</b> | 30              | 45   | 19.055   | -0.345     | <b>0.000</b> | 42            | 33   | 25.011   | -0.395     | <b>0.000</b> |
| IIA,IIB                       | 67        | 18   |          |            |              | 33          | 52   |          |            |              | 22        | 63   |          |            |              | 63              | 22   |          |            |              | 77            | 8    |          |            |              |
| <b>Nerve invasion</b>         |           |      |          |            |              |             |      |          |            |              |           |      |          |            |              |                 |      |          |            |              |               |      |          |            |              |
| Yes                           | 30        | 22   | 0.006    | -0.006     | <b>0.939</b> | 25          | 27   | 0.997    | -0.079     | 0.321        | 20        | 32   | 0.149    | -0.031     | 0.701        | 31              | 21   | 0.070    | 0.021      | 0.792        | 40            | 12   | 0.262    | -0.041     | 0.611        |
| NO                            | 63        | 45   |          |            |              | 61          | 47   |          |            |              | 45        | 63   |          |            |              | 62              | 46   |          |            |              | 79            | 29   |          |            |              |
| <b>CA19-9 (U/ml)</b>          |           |      |          |            |              |             |      |          |            |              |           |      |          |            |              |                 |      |          |            |              |               |      |          |            |              |
| ≤573.3                        | 31        | 47   | 21.127   | -0.363     | <b>0.000</b> | 52          | 26   | 10.214   | 0.253      | <b>0.000</b> | 38        | 40   | 4.133    | 0.161      | <b>0.042</b> | 34              | 44   | 13.211   | -0.287     | <b>0.000</b> | 49            | 29   | 10.661   | -0.258     | <b>0.001</b> |
| >573.3                        | 62        | 20   |          |            |              | 34          | 48   |          |            |              | 27        | 55   |          |            |              | 59              | 23   |          |            |              | 70            | 12   |          |            |              |

**Supplementary Table 5: The univariate analysis and multivariate analysis for overall survival and relapse free survival in the primary cohort (N=160) in our center**

| Clinico-pathological features | Overall Survival    |             |              |                       |             |              | Relapse Free Survival |              |              |                       |             |              |
|-------------------------------|---------------------|-------------|--------------|-----------------------|-------------|--------------|-----------------------|--------------|--------------|-----------------------|-------------|--------------|
|                               | Univariate analysis |             |              | Multivariate analysis |             |              | Univariate analysis   |              |              | Multivariate analysis |             |              |
|                               | HR                  | 95% CI      | P-value      | HR                    | 95%CI       | P-value      | HR                    | 95% CI       | P-value      | HR                    | 95%CI       | P-value      |
| <b>Gender</b>                 |                     |             |              |                       |             |              |                       |              |              |                       |             |              |
| Male                          | 1                   |             |              |                       |             |              | 1                     |              |              |                       |             |              |
| Female                        | 1.391               | 0.972-1.990 | 0.071        |                       |             |              | 0.630                 | 0.401-0.989  | 0.352        |                       |             |              |
| <b>Age</b>                    |                     |             |              |                       |             |              |                       |              |              |                       |             |              |
| ≤60                           | 1                   |             |              |                       |             |              | 1                     |              |              |                       |             |              |
| >60                           | 1.305               | 0.921-1.849 | 0.134        |                       |             |              | 1.575                 | 0.995-2.494  | 0.053        |                       |             |              |
| <b>Tumor size</b>             |                     |             |              |                       |             |              |                       |              |              |                       |             |              |
| ≤3.5cm                        | 1                   |             |              |                       |             |              | 1                     |              |              |                       |             |              |
| >3.5cm                        | 1.525               | 1.076-2.162 | <b>0.018</b> |                       |             |              | 1.784                 | 1.124-2.831  | <b>0.014</b> |                       |             |              |
| <b>Histological Grade</b>     |                     |             |              |                       |             |              |                       |              |              |                       |             |              |
| G1,G2                         | 1                   |             |              |                       |             |              | 1                     |              |              |                       |             |              |
| G3                            | 1.719               | 1.205-2.453 | <b>0.003</b> |                       |             |              | 1.396                 | 0.891-2.186  | <b>0.046</b> |                       |             |              |
| <b>LN metastasis</b>          |                     |             |              |                       |             |              |                       |              |              |                       |             |              |
| N0                            | 1                   |             |              |                       |             |              | 1                     |              |              |                       |             |              |
| N1                            | 1.814               | 1.270-2.590 | <b>0.001</b> |                       |             |              | 1.375                 | 0.867-2.180  | <b>0.017</b> |                       |             |              |
| <b>TNM stage</b>              |                     |             |              |                       |             |              |                       |              |              |                       |             |              |
| IA,IB                         | 1                   |             |              | 1                     |             |              | 1                     |              |              | 1                     |             |              |
| IIA,IIB                       | 3.097               | 2.101-4.565 | <b>0.000</b> | 1.148                 | 0.549-1.408 | <b>0.045</b> | 3.734                 | 2.274-6.133  | <b>0.000</b> | 2.779                 | 1.633-4.730 | <b>0.000</b> |
| <b>Nerve invasion</b>         |                     |             |              |                       |             |              |                       |              |              |                       |             |              |
| NO                            | 1                   |             |              |                       |             |              | 1                     |              |              |                       |             |              |
| yes                           | 0.957               | 0.659-1.388 | 0.815        |                       |             |              | 0.998                 | 0.602-1.655  | 0.994        |                       |             |              |
| <b>CA19-9 (U/ml)</b>          |                     |             |              |                       |             |              |                       |              |              |                       |             |              |
| ≤573.3                        | 1                   |             |              |                       |             |              | 1                     |              |              |                       |             |              |
| >573.3                        | 2.111               | 1.456-3.061 | <b>0.000</b> |                       |             |              | 1.671                 | 1.057-2.643  | <b>0.028</b> |                       |             |              |
| <b>CD8 index</b>              |                     |             |              |                       |             |              |                       |              |              |                       |             |              |
| low                           | 1                   |             |              | 1                     |             |              | 1                     |              |              | 1                     |             |              |
| high                          | 0.344               | 0.233-0.508 | <b>0.000</b> | 0.384                 | 0.193-0.762 | <b>0.006</b> | 0.252                 | 0.148-0.430  | <b>0.000</b> | 0.471                 | 0.204-1.086 | <b>0.047</b> |
| <b>CD133 index</b>            |                     |             |              |                       |             |              |                       |              |              |                       |             |              |
| low                           | 1                   |             |              | 1                     |             |              | 1                     |              |              | 1                     |             |              |
| high                          | 2.082               | 1.452-2.985 | <b>0.000</b> | 1.125                 | 0.715-1.769 | <b>0.016</b> | 3.155                 | 1.943-5.121  | <b>0.000</b> | 1.546                 | 0.841-2.841 | <b>0.016</b> |
| <b>TBs index</b>              |                     |             |              |                       |             |              |                       |              |              |                       |             |              |
| low                           | 1                   |             |              | 1                     |             |              | 1                     |              |              | 1                     |             |              |
| high                          | 2.634               | 1.805-3.844 | <b>0.000</b> | 1.286                 | 0.679-1.737 | <b>0.037</b> | 6.230                 | 3.445-11.268 | <b>0.000</b> | 2.967                 | 1.491-5.902 | <b>0.002</b> |
| <b>CD8/CD133 index</b>        |                     |             |              |                       |             |              |                       |              |              |                       |             |              |
| low                           | 1                   |             |              | 1                     |             |              | 1                     |              |              | 1                     |             |              |
| high                          | 0.300               | 0.203-0.443 | <b>0.000</b> | 0.917                 | 0.493-1.706 | <b>0.048</b> | 0.148                 | 0.084-0.261  | <b>0.000</b> | 0.210                 | 0.109-0.407 | <b>0.000</b> |
| <b>CD8/TBs index</b>          |                     |             |              |                       |             |              |                       |              |              |                       |             |              |
| low                           | 1                   |             |              | 1                     |             |              | 1                     |              |              | 1                     |             |              |
| high                          | 0.280               | 0.181-0.431 | <b>0.000</b> | 0.438                 | 0.239-0.801 | <b>0.007</b> | 0.199                 | 0.102-0.388  | <b>0.000</b> | 0.365                 | 0.178-0.749 | <b>0.006</b> |

**Supplementary Table 6: The association of CD8 index, CD133 index, TBs index, CD8/CD133 index, CD8/TBs index with clinico-pathological features- retrospective validation cohort (N=108) in our center**

| Clinico-pathological features | CD8 index |      |          |            |              | CD133 index |      |          |            |              | TBs index |      |          |            |              | CD8/CD133 index |      |          |            |              | CD8/TBs index |      |          |            |              |
|-------------------------------|-----------|------|----------|------------|--------------|-------------|------|----------|------------|--------------|-----------|------|----------|------------|--------------|-----------------|------|----------|------------|--------------|---------------|------|----------|------------|--------------|
|                               | Low       | high | $\chi^2$ | Spearman r | P-value      | Low         | high | $\chi^2$ | Spearman r | P-value      | Low       | high | $\chi^2$ | Spearman r | P-value      | Low             | high | $\chi^2$ | Spearman r | P-value      | Low           | high | $\chi^2$ | Spearman r | P-value      |
| <b>Gender</b>                 |           |      |          |            |              |             |      |          |            |              |           |      |          |            |              |                 |      |          |            |              |               |      |          |            |              |
| Male                          | 49        | 20   | 0.222    | 0.045      | 0.641        | 31          | 38   | 0.015    | -0.012     | 0.903        | 28        | 41   | 0.317    | -0.054     | 0.578        | 44              | 25   | 0.001    | -0.003     | 0.973        | 37            | 32   | 0.289    | -0.052     | 0.595        |
| Female                        | 26        | 13   |          |            |              | 18          | 21   |          |            |              | 18        | 21   |          |            |              | 25              | 14   |          |            |              | 23            | 16   |          |            |              |
| <b>Age</b>                    |           |      |          |            |              |             |      |          |            |              |           |      |          |            |              |                 |      |          |            |              |               |      |          |            |              |
| ≤60                           | 44        | 20   | 0.036    | -0.018     | 0.852        | 28          | 36   | 0.166    | -0.039     | 0.687        | 28        | 36   | 0.086    | 0.028      | 0.772        | 42              | 22   | 0.205    | 0.044      | 0.654        | 33            | 31   | 1.014    | -0.097     | 0.318        |
| >60                           | 31        | 13   |          |            |              | 21          | 23   |          |            |              | 18        | 26   |          |            |              | 27              | 17   |          |            |              | 27            | 17   |          |            |              |
| <b>Tumor size</b>             |           |      |          |            |              |             |      |          |            |              |           |      |          |            |              |                 |      |          |            |              |               |      |          |            |              |
| ≤3.5cm3                       | 10        | 27   | 47.723   | -0.665     | <b>0.000</b> | 23          | 14   | 6.403    | 0.243      | <b>0.011</b> | 25        | 12   | 14.357   | 0.365      | <b>0.000</b> | 13              | 24   | 20.169   | -0.432     | <b>0.000</b> | 10            | 27   | 18.552   | -0.414     | <b>0.000</b> |
| >3.5cm3                       | 65        | 6    |          |            |              | 26          | 45   |          |            |              | 21        | 50   |          |            |              | 56              | 15   |          |            |              | 50            | 21   |          |            |              |
| <b>Histological Grade</b>     |           |      |          |            |              |             |      |          |            |              |           |      |          |            |              |                 |      |          |            |              |               |      |          |            |              |
| G1,G2                         | 25        | 28   | 24.335   | -0.475     | <b>0.000</b> | 36          | 17   | 21.359   | 0.445      | <b>0.000</b> | 29        | 24   | 6.257    | 0.241      | <b>0.012</b> | 26              | 27   | 9.924    | -0.303     | <b>0.001</b> | 18            | 35   | 19.653   | -0.427     | <b>0.000</b> |
| G3                            | 50        | 5    |          |            |              | 13          | 42   |          |            |              | 17        | 38   |          |            |              | 43              | 12   |          |            |              | 42            | 13   |          |            |              |
| <b>LN metastasis</b>          |           |      |          |            |              |             |      |          |            |              |           |      |          |            |              |                 |      |          |            |              |               |      |          |            |              |
| N0                            | 29        | 21   | 5.474    | -0.231     | <b>0.016</b> | 30          | 20   | 8.040    | 0.273      | <b>0.004</b> | 32        | 18   | 17.450   | 0.402      | <b>0.000</b> | 25              | 25   | 7.785    | -0.268     | <b>0.005</b> | 18            | 32   | 14.420   | -0.365     | <b>0.000</b> |
| N1                            | 46        | 12   |          |            |              | 19          | 39   |          |            |              | 14        | 44   |          |            |              | 44              | 14   |          |            |              | 42            | 16   |          |            |              |
| <b>TNM stage</b>              |           |      |          |            |              |             |      |          |            |              |           |      |          |            |              |                 |      |          |            |              |               |      |          |            |              |
| IA,IB                         | 29        | 25   | 12.611   | -0.342     | <b>0.000</b> | 39          | 15   | 31.418   | 0.539      | <b>0.000</b> | 29        | 25   | 5.453    | 0.225      | <b>0.019</b> | 25              | 29   | 14.488   | -0.366     | <b>0.000</b> | 18            | 36   | 21.600   | -0.447     | <b>0.000</b> |
| IIA,IIB                       | 46        | 8    |          |            |              | 10          | 44   |          |            |              | 17        | 37   |          |            |              | 44              | 10   |          |            |              | 42            | 12   |          |            |              |
| <b>Nerve invasion</b>         |           |      |          |            |              |             |      |          |            |              |           |      |          |            |              |                 |      |          |            |              |               |      |          |            |              |
| Yes                           | 52        | 23   | 0.001    | -0.004     | 0.970        | 38          | 37   | 2.778    | 0.160      | 0.097        | 32        | 43   | 0.001    | 0.002      | 0.981        | 48              | 27   | 0.001    | 0.003      | 0.971        | 41            | 34   | 0.079    | -0.027     | 0.782        |
| NO                            | 23        | 10   |          |            |              | 11          | 22   |          |            |              | 14        | 19   |          |            |              | 21              | 12   |          |            |              | 19            | 14   |          |            |              |
| <b>CA19-9 (U/ml)</b>          |           |      |          |            |              |             |      |          |            |              |           |      |          |            |              |                 |      |          |            |              |               |      |          |            |              |
| ≤573.3                        | 39        | 25   | 5.358    | -0.223     | <b>0.021</b> | 33          | 31   | 2.430    | 0.150      | <b>0.001</b> | 39        | 25   | 21.621   | 0.447      | <b>0.000</b> | 35              | 29   | 5.765    | -0.231     | <b>0.016</b> | 30            | 34   | 4.794    | -0.211     | <b>0.029</b> |
| >573.3                        | 36        | 8    |          |            |              | 16          | 28   |          |            |              | 7         | 37   |          |            |              | 34              | 10   |          |            |              | 30            | 14   |          |            |              |

**Supplementary Table 7: The univariate analysis and multivariate analysis for overall survival and relapse free survival in the validation cohort (N=108) in our center**

| Clinico-pathological features | Overall Survival    |             |              |                       |             |              | Relapse Free Survival |             |              |                       |             |              |
|-------------------------------|---------------------|-------------|--------------|-----------------------|-------------|--------------|-----------------------|-------------|--------------|-----------------------|-------------|--------------|
|                               | Univariate analysis |             |              | Multivariate analysis |             |              | Univariate analysis   |             |              | Multivariate analysis |             |              |
|                               | HR                  | 95% CI      | P-value      | HR                    | 95%CI       | P-value      | HR                    | 95% CI      | P-value      | HR                    | 95%CI       | P-value      |
| <b>Gender</b>                 |                     |             |              |                       |             |              |                       |             |              |                       |             |              |
| Male                          | 1                   |             |              |                       |             |              | 1                     |             |              |                       |             |              |
| Female                        | 1.143               | 0.763-1.712 | 0.517        |                       |             |              | 0.983                 | 0.613-1.577 | 0.944        |                       |             |              |
| <b>Age</b>                    |                     |             |              |                       |             |              |                       |             |              |                       |             |              |
| ≤60                           | 1                   |             |              |                       |             |              | 1                     |             |              |                       |             |              |
| >60                           | 0.835               | 0.560-1.245 | 0.375        |                       |             |              | 0.738                 | 0.462-1.178 | 0.202        |                       |             |              |
| <b>Tumor size</b>             |                     |             |              |                       |             |              |                       |             |              |                       |             |              |
| ≤3.5cm                        | 1                   |             |              |                       |             |              | 1                     |             |              |                       |             |              |
| >3.5cm                        | 1.800               | 1.447-3.344 | <b>0.000</b> |                       |             |              | 1.616                 | 0.807-3.237 | <b>0.015</b> |                       |             |              |
| <b>Histological Grade</b>     |                     |             |              |                       |             |              |                       |             |              |                       |             |              |
| G1,G2                         | 1                   |             |              |                       |             |              | 1                     |             |              |                       |             |              |
| G3                            | 1.532               | 1.038-2.262 | <b>0.032</b> |                       |             |              | 1.634                 | 1.033-2.582 | <b>0.036</b> |                       |             |              |
| <b>LN metastasis</b>          |                     |             |              |                       |             |              |                       |             |              |                       |             |              |
| N0                            | 1                   |             |              |                       |             |              | 1                     |             |              |                       |             |              |
| N1                            | 1.570               | 1.059-2.328 | <b>0.025</b> |                       |             |              | 1.577                 | 0.990-2.511 | <b>0.050</b> |                       |             |              |
| <b>TNM stage</b>              |                     |             |              |                       |             |              |                       |             |              |                       |             |              |
| IA,IB                         | 1                   |             |              | 1                     |             |              | 1                     |             |              | 1                     |             |              |
| IIA,IIB                       | 2.727               | 1.823-4.079 | <b>0.000</b> | 1.921                 | 1.253-2.945 | <b>0.045</b> | 3.065                 | 1.882-4.994 | <b>0.000</b> | 2.503                 | 1.501-4.171 | <b>0.000</b> |
| <b>Nerve invasion</b>         |                     |             |              |                       |             |              |                       |             |              |                       |             |              |
| NO                            | 1                   |             |              |                       |             |              | 1                     |             |              |                       |             |              |
| yes                           | 1.196               | 0.783-1.826 | 0.407        |                       |             |              | 1.157                 | 0.711-1.884 | <b>0.558</b> |                       |             |              |
| <b>CA19-9 (U/ml)</b>          |                     |             |              |                       |             |              |                       |             |              |                       |             |              |
| ≤573.3                        | 1                   |             |              |                       |             |              | 1                     |             |              |                       |             |              |
| >573.3                        | 1.454               | 0.976-2.165 | <b>0.046</b> |                       |             |              | 1.47                  | 0.930-2.324 | <b>0.010</b> |                       |             |              |
| <b>CD8 index</b>              |                     |             |              |                       |             |              |                       |             |              |                       |             |              |
| low                           | 1                   |             |              | 1                     |             |              | 1                     |             |              | 1                     |             |              |
| high                          | 0.488               | 0.317-0.749 | <b>0.001</b> | 0.532                 | 0.334-0.845 | <b>0.018</b> | 0.435                 | 0.256-0.740 | <b>0.002</b> | 0.665                 | 0.480-2.463 | <b>0.049</b> |
| <b>CD133 index</b>            |                     |             |              |                       |             |              |                       |             |              |                       |             |              |
| low                           | 1                   |             |              | 1                     |             |              | 1                     |             |              | 1                     |             |              |
| high                          | 1.858               | 1.248-2.766 | <b>0.002</b> | 1.412                 | 1.101-2.081 | <b>0.022</b> | 2.427                 | 1.513-3.892 | <b>0.000</b> | 1.564                 | 0.606-2.237 | <b>0.039</b> |
| <b>TBs index</b>              |                     |             |              |                       |             |              |                       |             |              |                       |             |              |
| low                           | 1                   |             |              | 1                     |             |              | 1                     |             |              | 1                     |             |              |
| high                          | 1.854               | 1.239-2.774 | <b>0.003</b> | 1.208                 | 0.939-2.383 | <b>0.041</b> | 2.114                 | 1.296-3.449 | <b>0.003</b> | 1.647                 | 0.842-3.221 | <b>0.046</b> |
| <b>CD8/CD133 index</b>        |                     |             |              |                       |             |              |                       |             |              |                       |             |              |
| low                           | 1                   |             |              | 1                     |             |              | 1                     |             |              | 1                     |             |              |
| high                          | 0.223               | 0.137-0.363 | <b>0.000</b> | 0.356                 | 0.200-0.635 | <b>0.033</b> | 0.452                 | 0.275-0.742 | <b>0.002</b> | 0.632                 | 0.335-1.191 | <b>0.017</b> |
| <b>CD8/TBs index</b>          |                     |             |              |                       |             |              |                       |             |              |                       |             |              |
| low                           | 1                   |             |              | 1                     |             |              | 1                     |             |              | 1                     |             |              |
| high                          | 0.272               | 0.175-0.422 | <b>0.000</b> | 0.498                 | 0.296-0.839 | <b>0.041</b> | 0.560                 | 0.350-0.894 | <b>0.015</b> | 0.724                 | 0.689-1.297 | <b>0.044</b> |

**Supplementary table8: Detailed information of all the experimental reagents and antibodies**

| <b>Reagent</b>                   | <b>Source</b>       | <b>Catalog number</b> |
|----------------------------------|---------------------|-----------------------|
| The DAB substrate kit            | ORIGENE             | ZLI-9019              |
| The opal 7-color manual IHC kits | Perkin Elmer        | 2395285               |
| Anti-Rabbit/mouse polymer HRP    | MXB Biotechnologies | KIT-5020              |
| Hematoxylin-Eosin (HE) Stain Kit | Solarbio            | G1120                 |
| DAPI solution                    | Solarbio            | C0065                 |
| Collagenase                      | Sigma-Aldrich       | C2799                 |
| Hyaluronidase                    | Sigma-Aldrich       | H3506                 |
| DNase                            | Sigma-Aldrich       | DN25                  |
| Anti-human CD8 (IHC)             | ZSGB-BIO            | ZA-0508               |
| Anti-human CD133(IHC)            | Abcam               | Ab226355              |
| Anti-human CK19 (IHC)            | Abcam               | Ab7755                |
| Anti-human PD-1 (IHC)            | Abcam               | Ab52587               |
| Anti-human Tim-3 (IHC)           | Abcam               | Ab241332              |
| Anti-human CD133 (FCM)           | Biologend           | 372806                |
| Anti-human CD8 (FCM)             | Biologend           | 300922                |
